# Supplementary material
Source: PubMed Central journal article supplement (PMC4529061)
Supplement: NIHMS711730-supplement-Supplemental.pdf [file NIHMS711730-supplement-Supplemental.pdf]

## Supplementary Online Content

Subak LL, King WC, Belle SH, et al. Urinary incontinence before and after bariatric surgery. *JAMA Intern Med*. Published online June 22, 2015. doi:10.1001/jamainternmed.2015.2609.

### **eAppendix.** Clinical Trial Protocol

**eTable 1.** Urinary Incontinence Prevalence at Each Assessment by Whether Urinary Incontinence Status Was Observed or Missing at Follow-up Assessments (N=1987)

**eTable 2A.** Modeled Frequency of Urinary Incontinence Episodes and Prevalence of Any-, Stress-, and Urgency-Type Urinary Incontinence Before and After Bariatric Surgery

**eTable 2B.** Modeled Frequency of Urinary Incontinence Episodes and Prevalence of Any-, Stress-, and Urgency-Type Urinary Incontinence Before and After Bariatric Surgery (Sensitivity Analysis)

**eTable 3A.** Observed Urinary Incontinence Remission and Incidence After Bariatric Surgery

**eTable 3B.** Modeled Urinary Incontinence Remission and Incidence After Bariatric Surgery (Sensitivity Analysis)

This supplementary material has been provided by the authors to give readers additional information about their work.

**eAppendix.** Clinical Trial Protocol

Information on the protocol for this observational study is available at the clinical trials registration website (<https://clinicaltrials.gov/ct2/show/NCT00465829>).

**eTable 1.** Urinary incontinence prevalence at each assessment by whether urinary incontinence status was observed or missing at follow-up assessments (N=1987).

|                                 | Whether Urinary Incontinence Status Known |                     |            |                      |                      |            |                      |                      |            |
|---------------------------------|-------------------------------------------|---------------------|------------|----------------------|----------------------|------------|----------------------|----------------------|------------|
|                                 | 1 Year                                    |                     |            | 2 Year               |                      |            | 3 Year               |                      |            |
|                                 | Observed<br>(N=1738)                      | Missing<br>(N=249)  | <i>P</i> * | Observed<br>(N=1236) | Missing<br>(N=751)   | <i>P</i> * | Observed<br>(N=1156) | Missing<br>(N=831)   | <i>P</i> * |
| Urinary incontinence prevalence |                                           |                     |            |                      |                      |            |                      |                      |            |
| <b>Baseline</b>                 | 43.5%<br>missing=0                        | 43.4%<br>missing=0  | 0.23       | 34.4%<br>missing=0   | 58.5%<br>missing=0   | <.0001     | 34.9%<br>missing=0   | 55.5%<br>missing=0   | <.0001     |
| <b>Year 1</b>                   | -                                         | -                   |            | 4.9%<br>missing=143  | 36.3%<br>missing=106 |            | 6.6%<br>missing=134  | 30.9%<br>missing=115 |            |
| <b>Year 2</b>                   | 20.6%<br>missing=361                      | 21.0%<br>missing=68 |            | -                    | -                    |            | 8.1%<br>missing=258  | 42.2%<br>missing=171 |            |
| <b>Year 3</b>                   | 22.2%<br>missing=424                      | 21.2%<br>missing=79 |            | 8.9%<br>missing=243  | 48.9%<br>missing=260 |            | -                    | -                    |            |

\*Adjusted for factors independently related to missing follow-up data (i.e., site, age, and baseline smoking status).

**eTable 2a.** Modeled frequency of urinary incontinence episodes and prevalence of any-, stress-, and urgency-type urinary incontinence before and after bariatric surgery.

|                                          | Model-Based Estimates, %(95% CI) |                 |                 |                 | Adjusted <i>P</i> -value               |                  |                  |
|------------------------------------------|----------------------------------|-----------------|-----------------|-----------------|----------------------------------------|------------------|------------------|
|                                          | Baseline                         | 1 Year          | 2 Years         | 3 Years         | Years 1, 2, 3 vs Baseline <sup>a</sup> | Year 2 vs Year 1 | Year 3 vs Year 2 |
| <b>Women (N=1565)</b>                    |                                  |                 |                 |                 |                                        |                  |                  |
| Frequency of urinary incontinence        |                                  |                 |                 |                 | <.0001                                 | 0.01             | 0.51             |
| Never                                    | 23.9(21.6-26.1)                  | 52.1(49.4-54.9) | 49.3(46.4-52.2) | 47.4(44.4-50.4) |                                        |                  |                  |
| <Monthly                                 | 15.9(14.0-17.9)                  | 22.7(20.3-25.0) | 21.3(18.9-23.8) | 20.3(17.9-22.7) |                                        |                  |                  |
| Monthly                                  | 12.1(10.4-13.9)                  | 10.2(8.5-11.9)  | 9.7(7.9-11.4)   | 11.6(9.6-13.5)  |                                        |                  |                  |
| Weekly                                   | 22.8(20.4-25.2)                  | 9.4(7.8-11.1)   | 12.6(10.6-14.6) | 12.9(10.9-15.0) |                                        |                  |                  |
| Daily                                    | 25.3(22.5-28.0)                  | 5.5(4.3-6.7)    | 7.1(5.6-8.6)    | 7.8(6.2-9.4)    |                                        |                  |                  |
| Prevalent urinary incontinence (≥weekly) |                                  |                 |                 |                 |                                        |                  |                  |
| Any-type                                 | 49.3(46.9-51.9)                  | 18.3(16.4-20.4) | 23.4(21.2-25.7) | 24.0(21.8-26.5) | <.0001                                 | <.0001           | 0.93             |
| Stress-type                              | 42.7(40.3-45.3)                  | 14.1(12.4-16.0) | 17.3(15.4-19.4) | 18.7(16.7-21.0) | <.0001                                 | <.01             | 0.48             |
| Urgency-type                             | 33.3(31.0-35.7)                  | 12.2(10.6-14.0) | 16.9(15.1-19.1) | 17.1(15.2-19.3) | <.0001                                 | <.0001           | 0.99             |
| <b>Men (N=422)</b>                       |                                  |                 |                 |                 |                                        |                  |                  |
| Frequency of urinary incontinence        |                                  |                 |                 |                 | <.0001                                 | 0.96             | 0.84             |
| Never                                    | 55.6(50.6-60.6)                  | 74.1(69.4-78.7) | 73.2(68.2-78.2) | 69.7(64.3-75.1) |                                        |                  |                  |
| <Monthly                                 | 16.7(12.9-20.6)                  | 13.3(9.6-17.0)  | 11.2(7.6-14.8)  | 12.3(8.4-16.3)  |                                        |                  |                  |
| Monthly                                  | 7.5(4.9-10.1)                    | 3.8(1.9-5.8)    | 6.7(3.9-9.6)    | 6.9(3.9-9.8)    |                                        |                  |                  |
| Weekly                                   | 10.8(7.6-13.9)                   | 5.7(3.3-8.2)    | 5.7(3.1-8.2)    | 7.3(4.2-10.3)   |                                        |                  |                  |
| Daily                                    | 9.4(6.3-12.4)                    | 3.1(1.4-4.8)    | 3.2(1.4-5.1)    | 3.8(1.7-6)      |                                        |                  |                  |
| Prevalent urinary incontinence (≥weekly) |                                  |                 |                 |                 |                                        |                  |                  |
| Any-type                                 | 21.8(18.2-26.1)                  | 9.8(7.2-13.4)   | 10.4(7.6-14.2)  | 12.2(9.0-16.4)  | <.001                                  | 0.99             | 0.77             |
| Stress-type                              | 4.3(2.7-6.8)                     | 2.6(1.4-4.9)    | 2.6(1.3-5.1)    | 1.9(0.8-4.3)    | NS <sup>b</sup>                        | NS <sup>b</sup>  | NS <sup>b</sup>  |
| Urgency-type                             | 15.9(12.8-19.8)                  | 6.0(4.0-8.9)    | 6.7(4.5-9.9)    | 8.2(5.6-11.9)   | <.01                                   | 0.93             | 0.76             |

<sup>a</sup>Each follow-up time point was compared to baseline.

<sup>b</sup>Overall *P* value for a time effect was 0.31 so pairwise comparisons were not made.

**eTable 2b.** Modeled frequency of urinary incontinence episodes and prevalence of any-, stress-, and urgency-type urinary incontinence before and after bariatric surgery (sensitivity analysis).

|                                          | Pattern-Mixture Model-Based Estimates, %(95% CI) |                 |                 |                 | Adjusted P-value                       |                  |                  |
|------------------------------------------|--------------------------------------------------|-----------------|-----------------|-----------------|----------------------------------------|------------------|------------------|
|                                          | Baseline                                         | 1 Year          | 2 Years         | 3 Years         | Years 1, 2, 3 vs Baseline <sup>a</sup> | Year 2 vs Year 1 | Year 3 vs Year 2 |
| <b>Women (N=1565)</b>                    |                                                  |                 |                 |                 |                                        |                  |                  |
| Frequency of urinary incontinence        |                                                  |                 |                 |                 | <.0001                                 | <.01             | 0.15             |
| Never                                    | 24.2(21.7-26.7)                                  | 56.2(53.2-59.2) | 53.6(50.6-56.7) | 52.0(48.9-55.1) |                                        |                  |                  |
| <Monthly                                 | 14.8(12.7-16.9)                                  | 22.2(19.5-24.9) | 20.7(18.0-23.4) | 19.6(16.9-22.2) |                                        |                  |                  |
| Monthly                                  | 10.7(8.8-12.5)                                   | 8.7(7.0-10.4)   | 8.2(6.5-10.0)   | 9.8(7.9-11.8)   |                                        |                  |                  |
| Weekly                                   | 23.5(20.6-26.4)                                  | 8.4(6.8-10.0)   | 11.4(9.4-13.5)  | 11.8(9.8-13.9)  |                                        |                  |                  |
| Daily                                    | 26.8(23.5-30.2)                                  | 4.4(3.3-5.6)    | 6.0(4.6-7.5)    | 6.8(5.2-8.3)    |                                        |                  |                  |
| Prevalent urinary incontinence (≥weekly) |                                                  |                 |                 |                 |                                        |                  |                  |
| Any-type                                 | 49.3(46.9-51.9)                                  | 18.3(16.4-20.4) | 22.9(20.7-25.2) | 24.0(21.8-26.5) | <.0001                                 | <.0001           | 0.29             |
| Stress-type                              | 42.5(40.1-45.1)                                  | 14.0(12.3-15.9) | 17.0(15.0-19.1) | 18.7(16.7-21.0) | <.0001                                 | <.01             | 0.11             |
| Urgency-type                             | 33.4(31.1-35.8)                                  | 12.1(10.5-13.9) | 16.8(14.9-19.0) | 17.4(15.4-19.7) | <.0001                                 | <.0001           | 0.58             |
| <b>Men (N=422)</b>                       |                                                  |                 |                 |                 |                                        |                  |                  |
| Frequency of urinary incontinence        |                                                  |                 |                 |                 | <.0001                                 | 0.45             | 0.57             |
| Never                                    | 54.3(47.6-61.0)                                  | 75.4(69.9-80.8) | 74.3(68.4-80.3) | 71.8(65.9-77.7) |                                        |                  |                  |
| <Monthly                                 | 14.1(9.9-18.3)                                   | 10.8(7.1-14.5)  | 8.4(5.2-11.7)   | 9.7(6.1-13.3)   |                                        |                  |                  |
| Monthly                                  | 6.6(3.6-9.6)                                     | 3.2(1.2-5.2)    | 5.4(2.6-8.2)    | 5.6(2.7-8.6)    |                                        |                  |                  |
| Weekly                                   | 7.2(4.2-10.2)                                    | 3.5(1.5-5.5)    | 3.4(1.5-5.3)    | 4.3(2-.06.6)    |                                        |                  |                  |
| Daily                                    | 17.7(10.6-24.9)                                  | 7.1(3.0-11.2)   | 8.4(3.7-13.2)   | 8.6(3.9-13.3)   |                                        |                  |                  |
| Prevalent urinary incontinence (≥weekly) |                                                  |                 |                 |                 |                                        |                  |                  |
| Any-type                                 | 21.8(18.2-26.1)                                  | 10.7(7.8-14.4)  | 10.6(7.8-14.5)  | 12.5(9.2-16.9)  | <.001                                  | 0.98             | 0.33             |
| Stress-type                              | 4.4(2.8-7.0)                                     | 3.7(1.4-9.8)    | 4.5(1.6-12.7)   | 5.3(0.5-54.0)   | 0.67;0.25;0.77                         | 0.90             | 0.37             |
| Urgency-type                             | 15.9(12.8-19.8)                                  | 6.5(4.3-9.9)    | 6.6(4.5-9.7)    | 8.6(5.8-12.6)   | <.01                                   | 0.90             | 0.23             |

<sup>a</sup>Each follow-up time point was compared to baseline.

**eTable 3a.** Observed urinary incontinence remission and incidence after bariatric surgery.

|                                   | Observed Number/Total (%) |        |         |        |         |         |
|-----------------------------------|---------------------------|--------|---------|--------|---------|---------|
|                                   | 1 Year                    |        | 2 Years |        | 3 Years |         |
| <b>Women</b>                      |                           |        |         |        |         |         |
| <b>Remission since baseline</b>   |                           |        |         |        |         |         |
| Any-type urinary incontinence     | 451/674                   | (66.9) | 373/620 | (60.2) | 355/601 | (59.1)  |
| Complete remission                | 195/674                   | (28.9) | 166/620 | (26.8) | 165/601 | (27.5)  |
| Stress-type urinary incontinence  | 397/554                   | (71.7) | 348/511 | (68.1) | 324/493 | (65.7)  |
| Urgency-type urinary incontinence | 320/443                   | (72.2) | 240/395 | (60.8) | 238/393 | (60.6)  |
| <b>Incidence since baseline</b>   | 27/699                    | (3.9)  | 42/621  | (6.8)  | 44/587  | (7.5)   |
| <b>Men</b>                        |                           |        |         |        |         |         |
| <b>Remission since baseline</b>   |                           |        |         |        |         |         |
| Any-type urinary incontinence     | 55/82                     | (67.1) | 52/73   | (71.2) | 48/69   | (69.6)  |
| Complete remission                | 40/82                     | (48.8) | 34/73   | (46.6) | 31/69   | (44.9)  |
| Stress-type urinary incontinence  | 10/13                     | (76.9) | 13/15   | (86.7) | 14/14   | (100.0) |
| Urgency-type urinary incontinence | 42/59                     | (71.2) | 40/55   | (72.7) | 37/50   | (74.0)  |
| <b>Incidence since baseline</b>   | 11/283                    | (3.9)  | 12/244  | (4.9)  | 17/227  | (7.5)   |

**eTable 3b.** Modeled urinary incontinence remission and incidence after bariatric surgery (sensitivity analysis).

|                                   | n   | Pattern-Mixture Model-Based Estimates,<br>% (95% CI) |                 |                 | Adjusted P value       |                        |
|-----------------------------------|-----|------------------------------------------------------|-----------------|-----------------|------------------------|------------------------|
|                                   |     | 1 Year                                               | 2 Years         | 3 Years         | Year 2<br>vs<br>Year 1 | Year 3<br>vs<br>Year 2 |
| <b>Women</b>                      |     |                                                      |                 |                 |                        |                        |
| <b>Remission since baseline</b>   |     |                                                      |                 |                 |                        |                        |
| Any-type urinary incontinence     | 772 | 67.0(63.7-70.6)                                      | 60.5(56.9-64.3) | 59.4(55.8-63.2) | <.001                  | 0.53                   |
| Complete remission                |     | 28.6(25.4-32.3)                                      | 28.1(24.8-31.8) | 30.5(27.2-34.2) | 0.80                   | 0.25                   |
| Stress-type urinary incontinence  | 666 | 70.6(67.0-74.4)                                      | 67.9(64.2-71.8) | 64.9(61.0-69.0) | 0.17                   | 0.14                   |
| Urgency-type urinary incontinence | 524 | 71.9(67.9-76.1)                                      | 60.3(55.8-65.2) | 59.2(54.7-64.2) | <.0001                 | 0.66                   |
| <b>Incidence since baseline</b>   | 793 | 4.0(2.8-5.9)                                         | 6.7(5.0-8.9)    | 7.9(6.0-10.3)   | 0.01                   | 0.35                   |
| <b>Men</b>                        |     |                                                      |                 |                 |                        |                        |
| <b>Remission since baseline</b>   |     |                                                      |                 |                 |                        |                        |
| Any-type urinary incontinence     | 92  | 67.1(57.8-77.9)                                      | 68.3(58.8-79.3) | 70.6(61.2-81.5) | 0.79                   | 0.66                   |
| Complete remission                |     | 48.4(38.8-60.5)                                      | 48.2(38.1-61.0) | 49.5(38.9-63.0) | 0.97                   | 0.83                   |
| Stress-type urinary incontinence  | 20  | *                                                    | *               | *               | *                      | *                      |
| Urgency-type urinary incontinence | 67  | 71.8(61.3-84)                                        | 71.1(60.9-83.2) | 72.7(61.8-85.6) | 0.89                   | 0.80                   |
| <b>Incidence since baseline</b>   | 330 | 4.4(2.4-7.8)                                         | 4.7(2.6-8.5)    | 7.7(4.8-12.5)   | 0.83                   | 0.13                   |

\* Too rare to model.
